# Supplementary material for: Base excision DNA repair in the embryonic development of the sea urchin, Strongylocentrotus intermedius
Source: Royal Society of Chemistry journal article supplement (doi:10.1039/c5mb00906e), 2016-05-09
Supplement: c5mb00906e2.pdf [file c5mb00906e2.pdf]

## Supplementary figures

**Fig. S1.** Alignment of sequences of human UNG nuclear isoform (human\_UNG2) and *S. purpuratus* putative uracil-DNA glycosylase (XP\_791566.1). Residues responsible for interaction with DNA are marked by asterisks based on human UNG X-ray structure.<sup>1</sup> Identical, highly conserved, and moderately conserved residues in the alignment are labeled by black, dark grey, and light grey boxes, respectively. The alignment and conservation values were produced with Clustal Omega.<sup>2</sup>

## Supplementary references

- 1 S. S. Parikh, C. D. Mol, G. Slupphaug, S. Bharati, H. E. Krokan and J. A. Tainer, *EMBO J.*, 1998, **17**, 5214–5226.
- 2 F. Sievers, A. Wilm, D. Dineen, T. J. Gibson, K. Karplus, W. Li, R. Lopez, H. McWilliam, M. Remmert, J. Söding, J. D. Thompson and D. G. Higgins, *Mol. Syst. Biol.*, 2011, **7**, 539.
